# Supplementary material
Source: PubMed Central journal article supplement (PMC5383392)
Supplement: CJN.10090916SupplementaryData.pdf [file CJN.10090916SupplementaryData.pdf]

**Supplemental File:**

**Table S1. Interview question guide**

**Beliefs and Attitudes to Bowel Cancer Screening in Patients with Chronic Kidney Disease Interview Guide**

**1. Introduction**

**2. General health concerns**

- a. Besides kidney disease, do you have other health issues? Which of these are you most/least worried about – why?
- b. Are there any health issues that you think you might face in the future that you might be worried about – why?

**3. Attitudes to bowel cancer and bowel cancer risk**

- a. One health issue we're interested in is bowel cancer. What is the first thing that comes to mind when I mention bowel cancer?
- b. What sorts of things do you think might cause bowel cancer, or might cause someone to have a higher risk of getting bowel cancer?
- c. How would someone know that they had bowel cancer (signs/symptoms)?
- d. If someone has bowel cancer, how serious do you think it is – why?
- e. Do you think people with kidney disease have less, higher, or the same risk of bowel cancer than people without kidney disease – why?
- f. Have you talked with anyone about bowel cancer? What did you talk about?

**4. Beliefs about screening (FOBT)**

- a. Do you think it is possible to prevent bowel cancer – why/how?
- b. Have you ever done a FOBT/colonoscopy before – why/why not? If yes, what was the worst/best thing about doing it?
- c. What do you think are the benefits of FOBT/colonoscopy, and what are the downsides?
- d. Personally, is bowel cancer screening a high priority to you – why? Are there other things you see as higher priority? What are they?

**5. Perspectives on participation in screening**

- a. How did you come to decide to participate/not participate in screening for bowel cancer?
- b. Was your decision influenced by how you were approached or asked to participate in screening?

**6. Close**

- a. Do you have any suggestions as to what kinds of things might help/encourage patients like yourself to complete the FOBT?
- b. Is there anything else about your thoughts on FOBT or Bowel Cancer that you would like to add?
